# Supplementary material
Source: PubMed Central journal article supplement (PMC1425854)
Supplement: plntcell_tpc.105.037689_1.pdf [file plntcell_tpc.105.037689_1.pdf]

---

**Supplemental Table 1 Oligonucleotides Used for the Preparation of the Hybridization Probes**

---

| Gene Names        | Primer Sequences                  |                                    |
|-------------------|-----------------------------------|------------------------------------|
|                   | Forward Primers                   | Reverse Primers                    |
| <i>psbA</i>       | 5'-TTATCCATTTGTAGATGGAGCCTCA-3'   | 5'-ATGACTGCAATTTTAGAGAGACGCG-3'    |
| <i>psbB</i>       | 5'-GCAAGGATCCATGGGTTTGCCTTGG-3'   | 5'-GCAACTCGAGATCAGACTGCTTGTGCG-3'  |
| <i>psbC</i>       | 5'-GCGGGATCCATGAAAACCTTATATTCC-3' | 5'-GGCCTCGAGTTAGTTAAGAGGAGTCATG-3' |
| <i>psbD</i>       | 5'-TGTTTCGGAAATGGTTGAAGTAGATG-3'  | 5'-GGTAGAACCTCCTCAGGGAATATAA-3'    |
| <i>psbE-F-J-L</i> | 5'-CGCCTCGAGAATTTCTACAGGGATG-3'   | 5'-GCGGGATCCATGTCTGGAAGCACAGGAG-3' |
| <i>psbK-I</i>     | 5'-CCGCTCGAGTATCCACAAGAACACC-3'   | 5'-CTTGGATCCTTATTCTTCACGTCCCGG-3'  |
| <i>psaA</i>       | 5'-CAATTGGCGCATTGGTCTTCGCAG-3'    | 5'-GTGCTCGCTGTTTCACCAGGGGCTG-3'    |
| <i>petA</i>       | 5'-TATGATTGGTTCGAAGAACGTCTTG-3'   | 5'-TTATAAGGGACCAGAAATACCTTGC-3'    |

---
